# Supplementary material for: Observation of cascade f → d → f energy transfer in sensitizing near-infrared (NIR) lanthanide complexes containing the Ru(ii) polypyridine metalloligand
Source: Royal Society of Chemistry journal article supplement (doi:10.1039/c6nj00089d), 2016-01-01
Supplement: c6nj00089d1.pdf [file c6nj00089d1.pdf]

## Supporting Information

for submission to New J Chem

### Observation of cascade $f \rightarrow d \rightarrow f$ energy transfer in sensitizing near-infrared (NIR) lanthanide complexes containing Ru(II) polypyridine metalloligand

Lu-Yin Zhang<sup>a</sup>, Kang Li<sup>a</sup>, Mei Pan<sup>a,b\*</sup>, Ya-Nan Fan<sup>a</sup>, Hai-Ping Wang<sup>a</sup>, and Cheng-Yong Su<sup>a,c\*</sup>

<sup>a</sup> MOE Laboratory of Bioinorganic and Synthetic Chemistry, State Key Laboratory of Optoelectronic Materials and Technologies, Lehn Institute of Functional Materials, School of Chemistry and Chemical Engineering, Sun Yat-Sen University, Guangzhou 510275, China

panm@mail.sysu.edu.cn; cescyc@mail.sysu.edu.cn

<sup>b</sup> State Key Laboratory of Structural Chemistry, Fujian Institute of Research on the Structure of Matter, Chinese Academy of Sciences, Fuzhou 350002, China

<sup>c</sup> State Key Laboratory of Applied Organic Chemistry, Lanzhou University, Lanzhou 730000, China

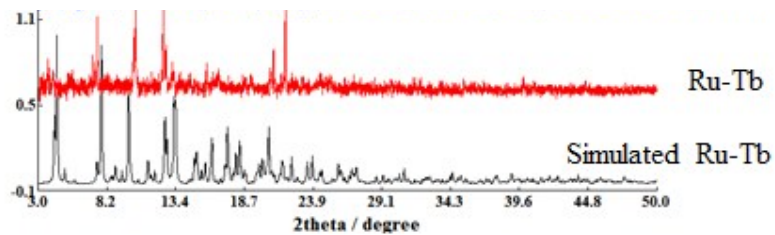

Fig. S1 PXRd patterns for the grounded crystalline sample of Tb-Ru complex compared with the simulated pattern based on the single-crystal data.

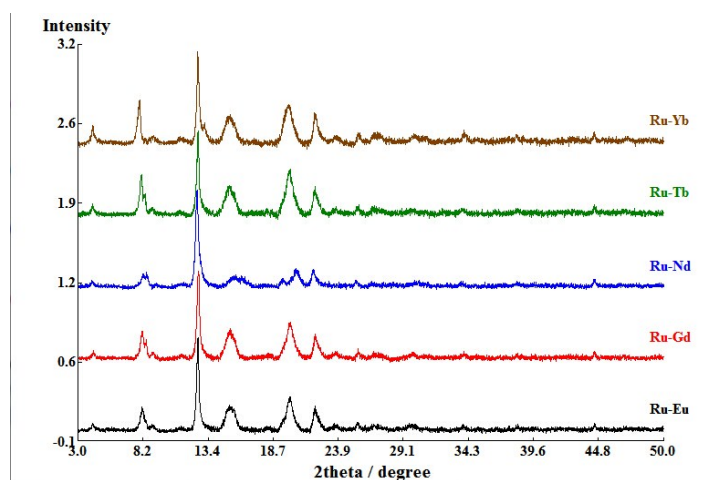

Fig. S2 PXRd patterns for the freshly precipitated samples of Ru-Ln isomorphous series.

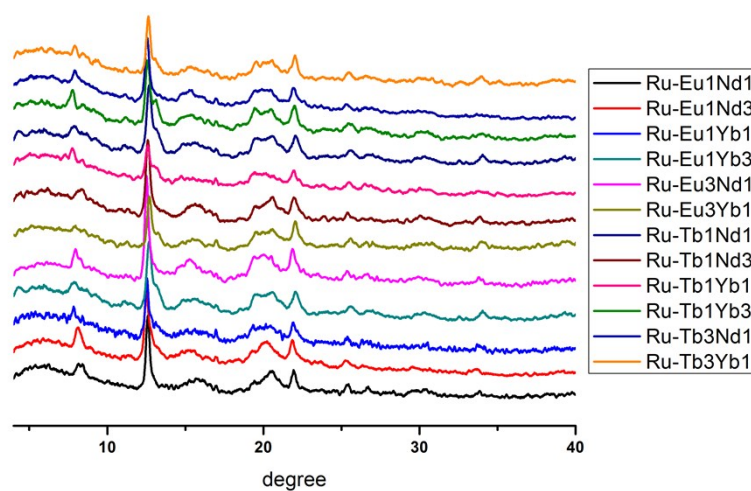

Fig. S3 PXRd patterns for Ln<sub>1</sub>-Ru-Ln<sub>2</sub> isomorphous crystals.

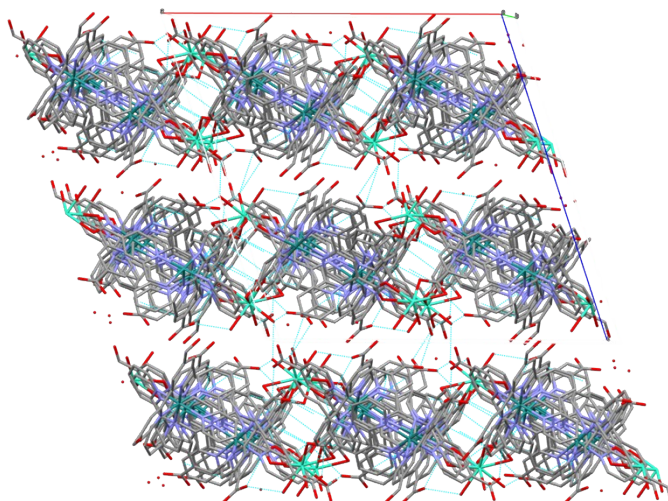

Fig. S4 Extended packing in the crystal lattice of complex Tb-Ru.

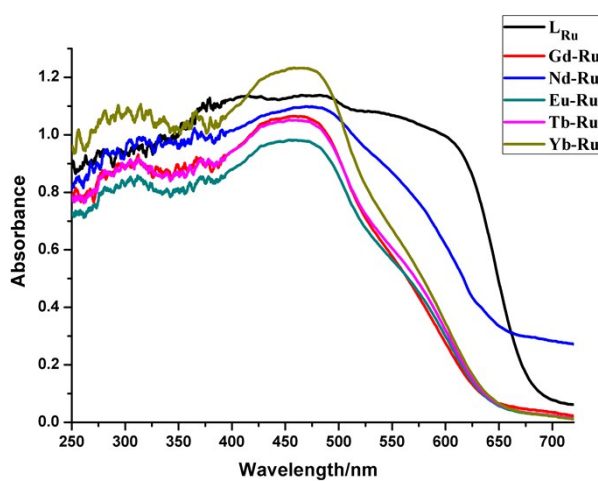

Fig. S5 Solid state UV-vis reflectance spectra for  $L_{Ru}$  and different Ln-Ru complexes.

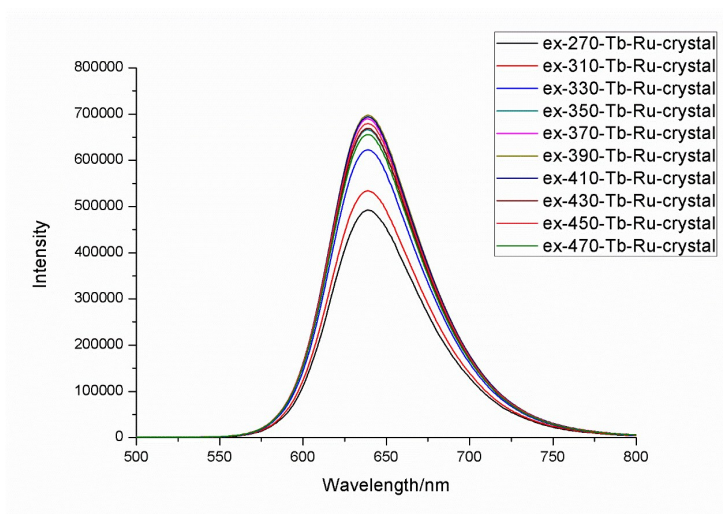

Fig. S6 Solid state excitation-wavelength-dependent emission spectra of Tb-Ru crystals.

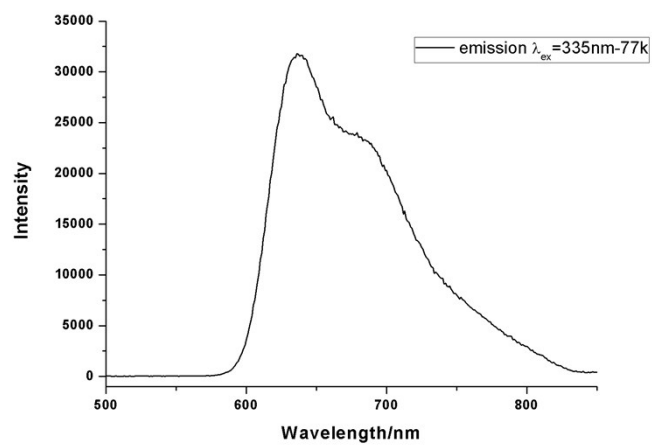

Fig. S7 Solid state phosphorescence of Gd-Ru complex at 77 K.

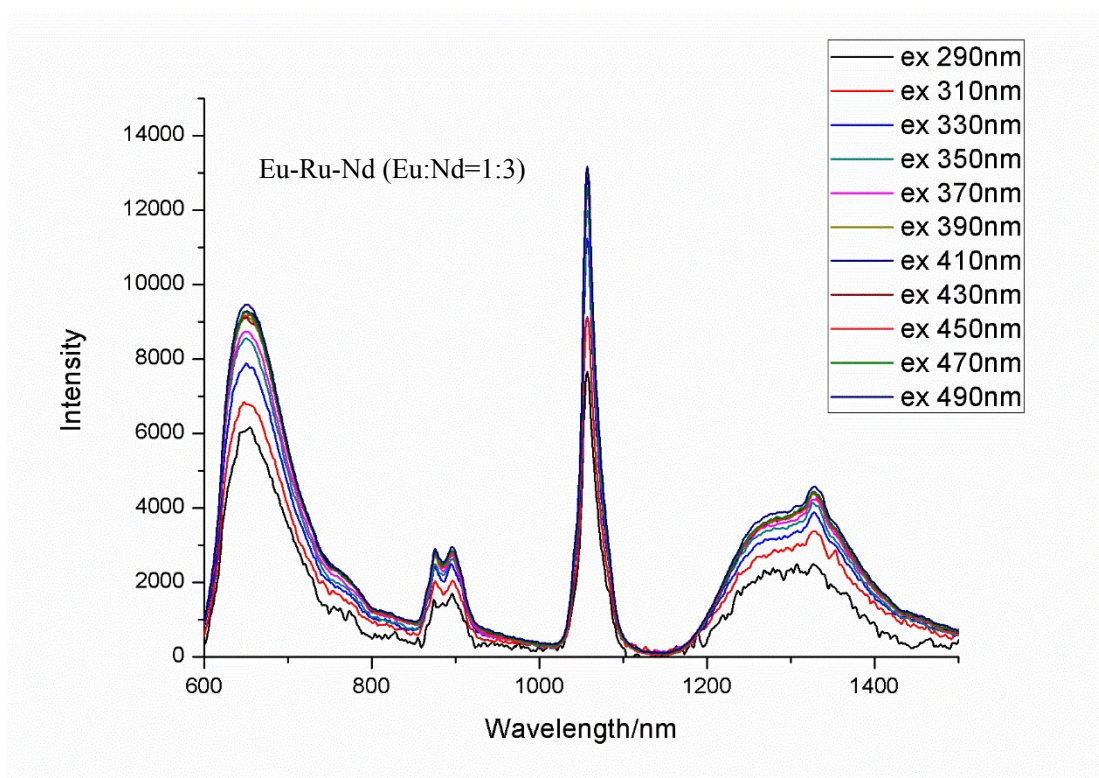

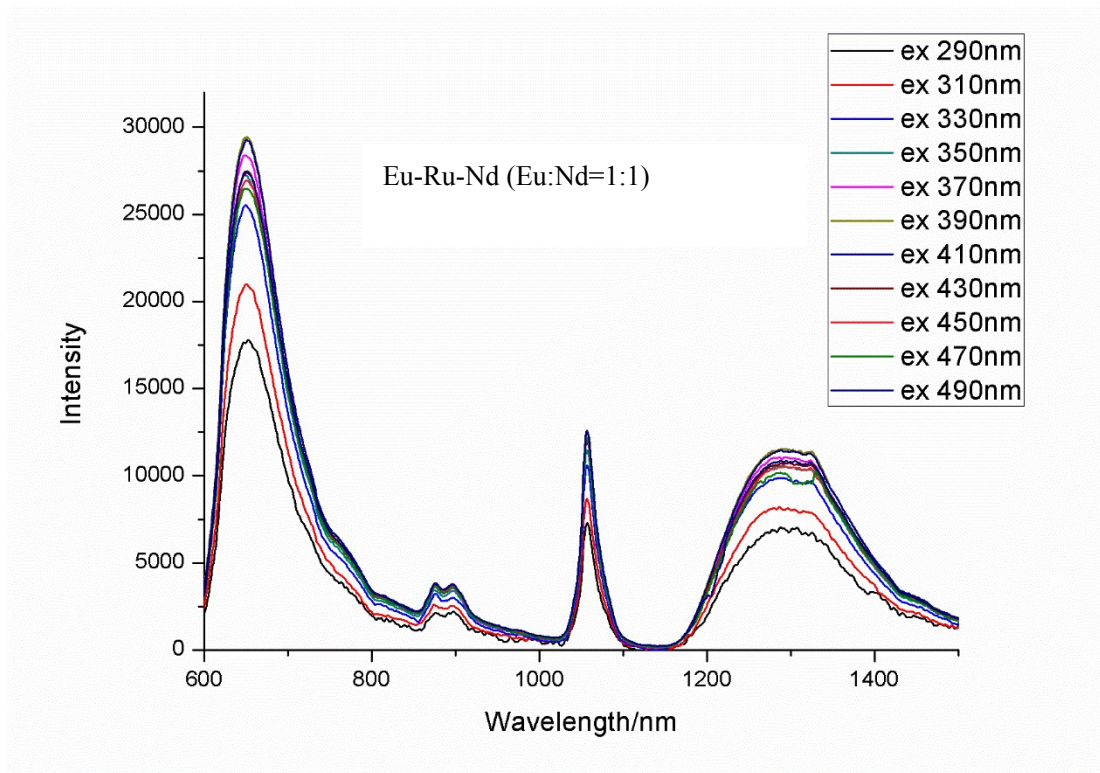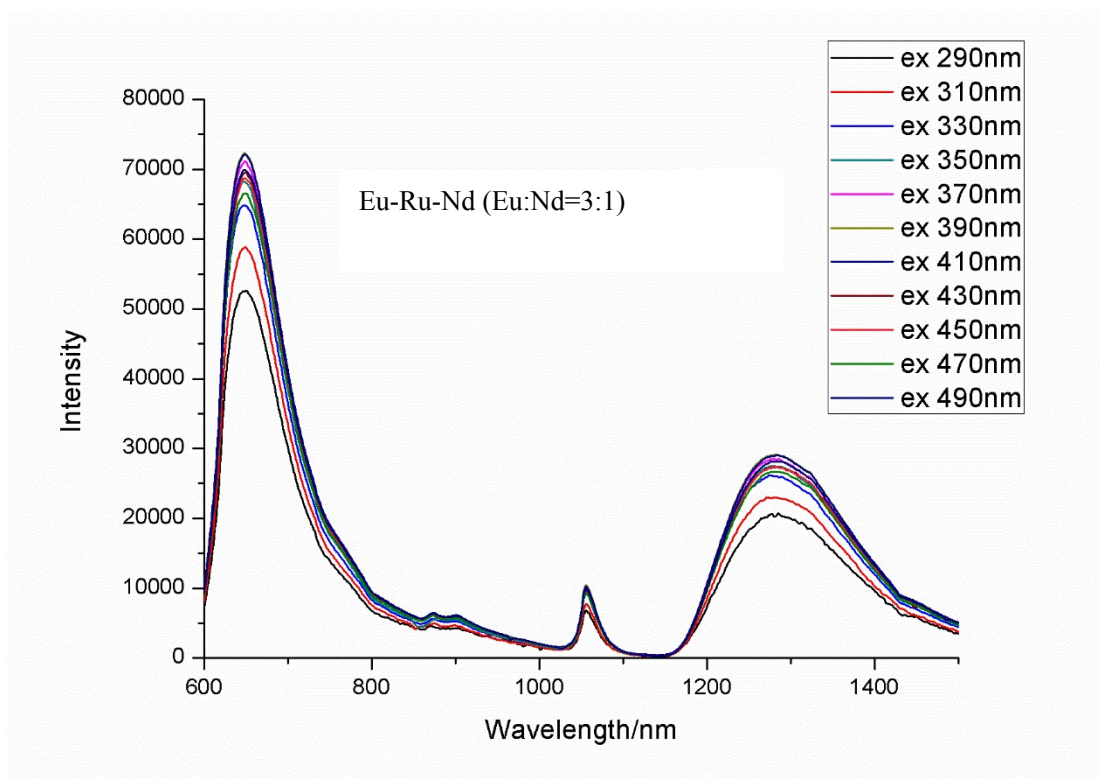

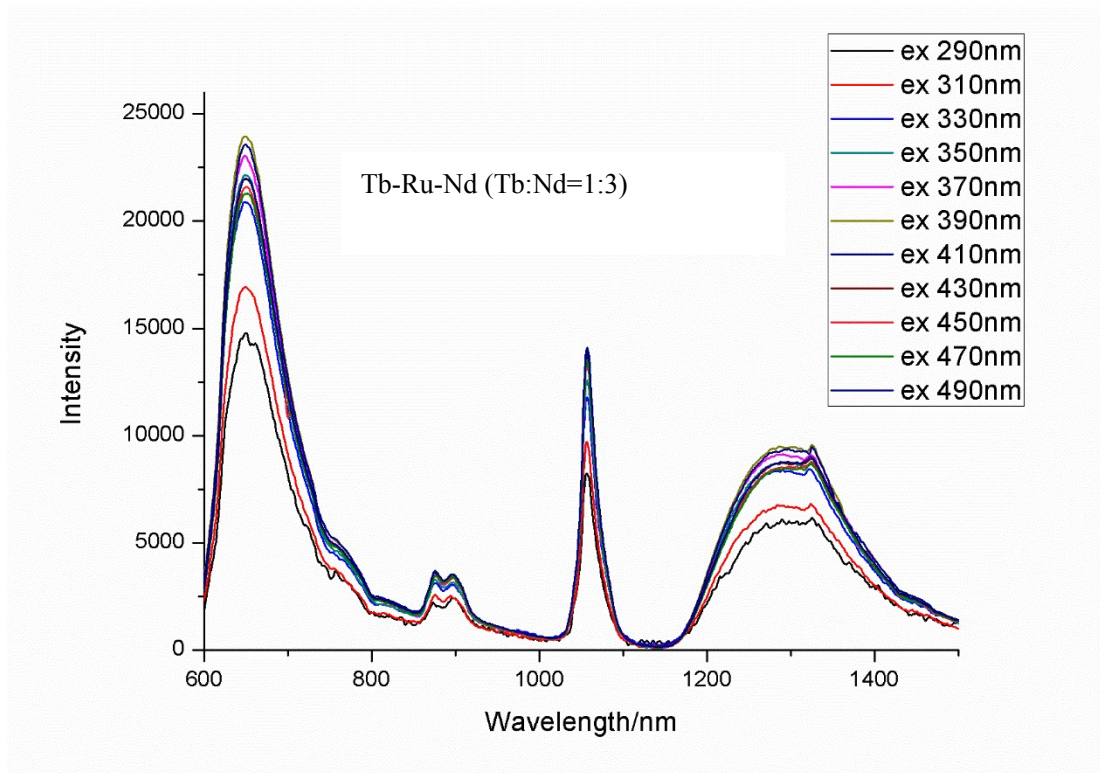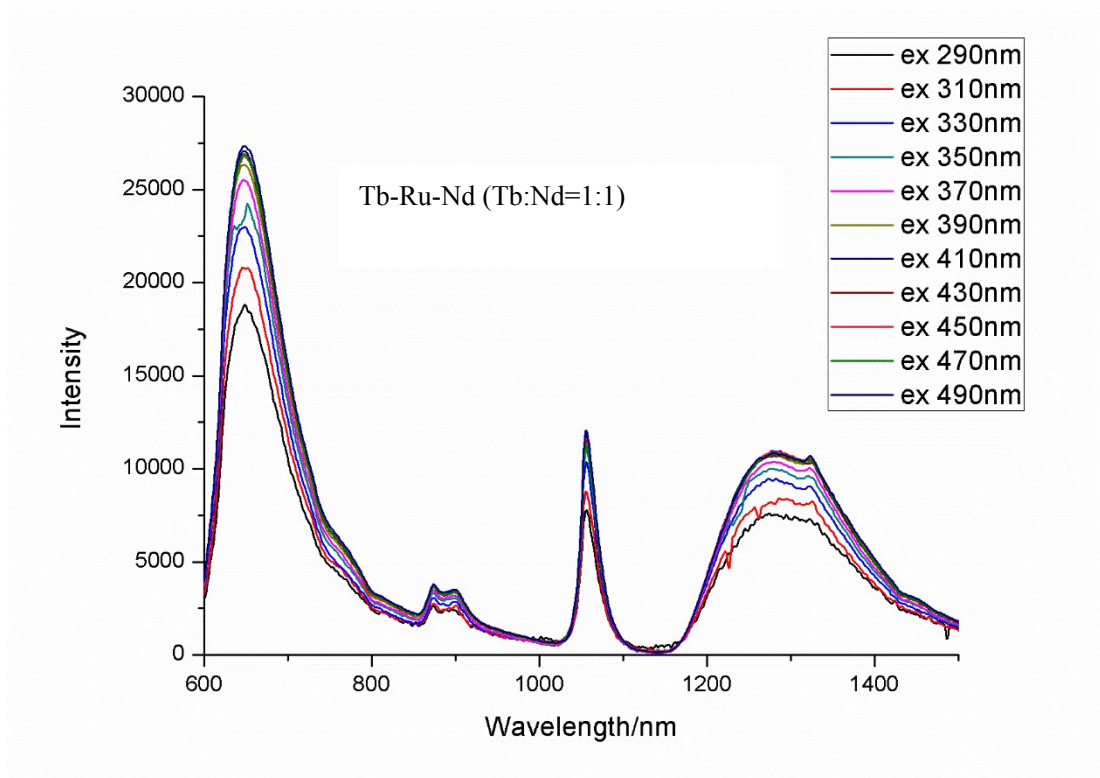

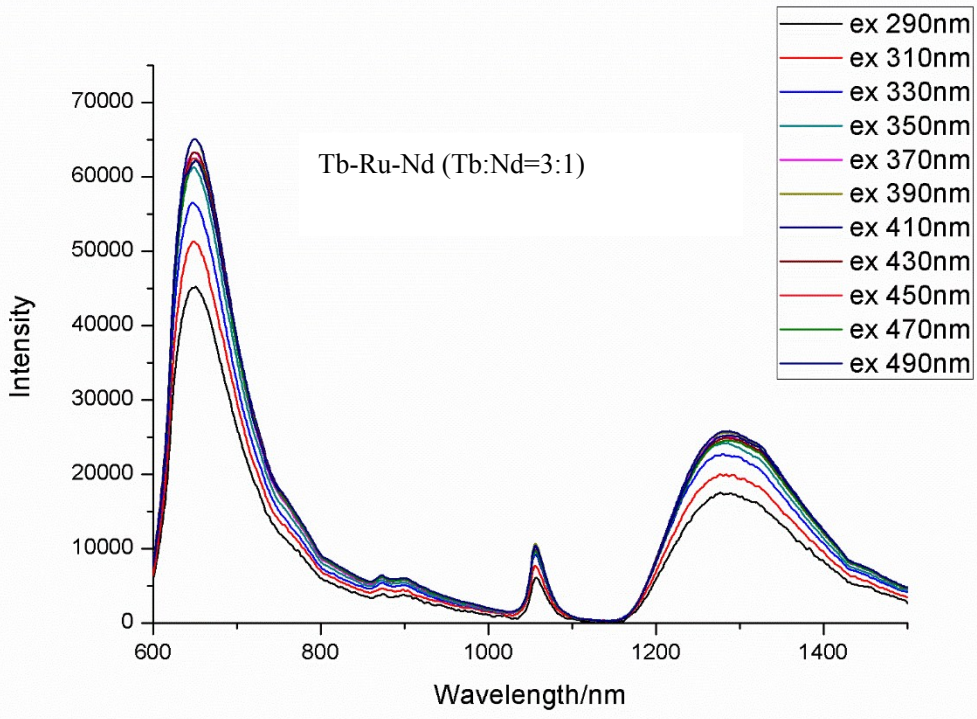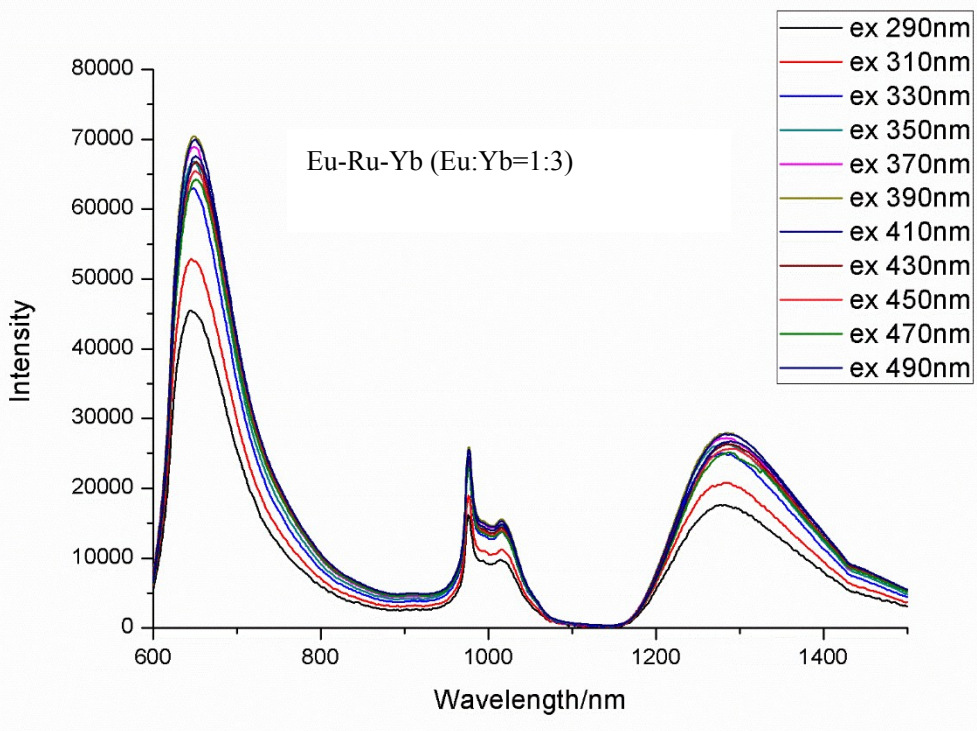

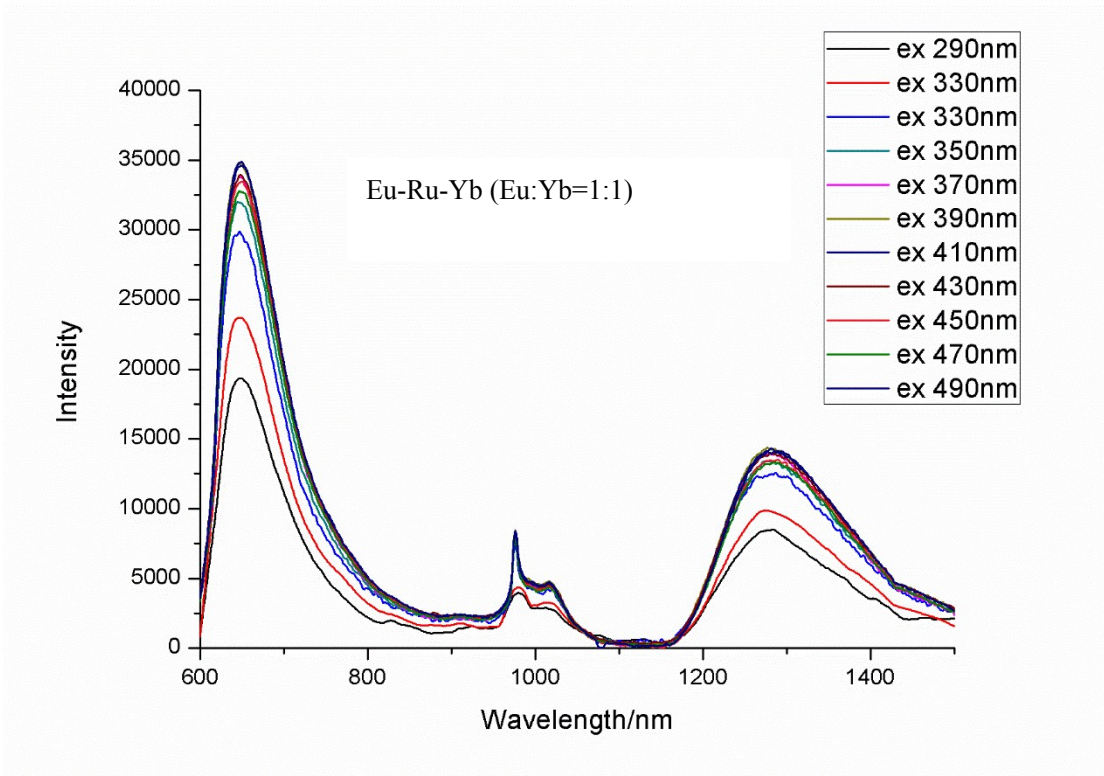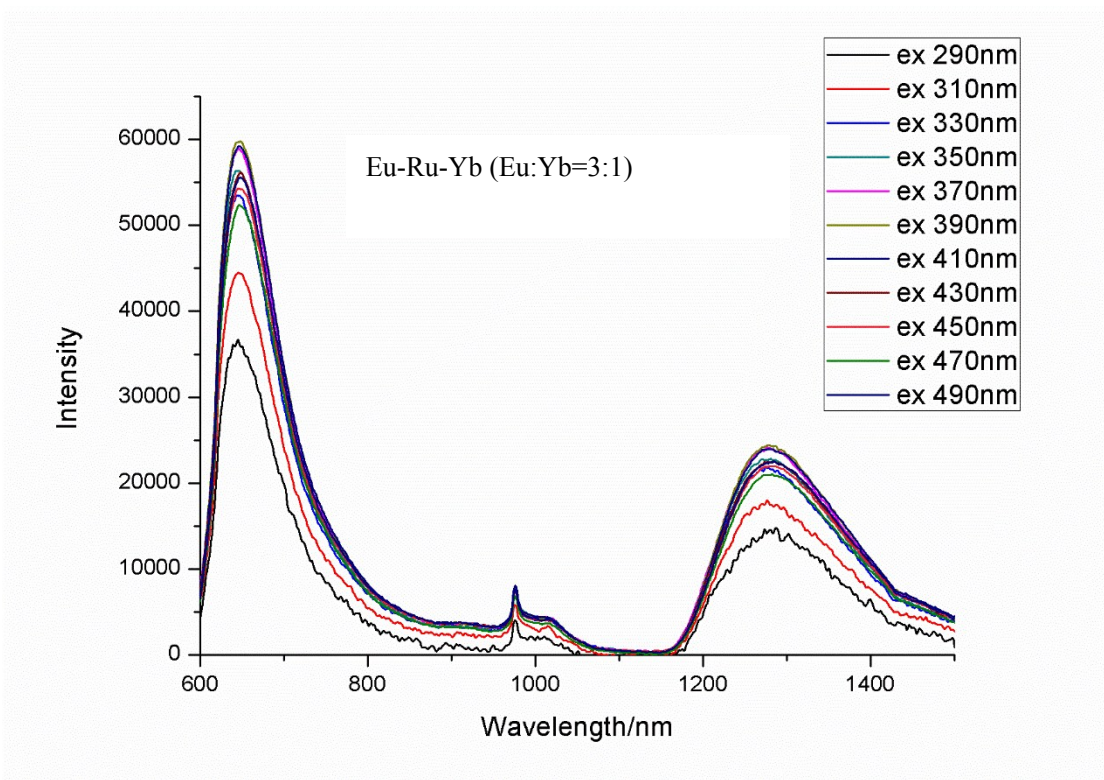



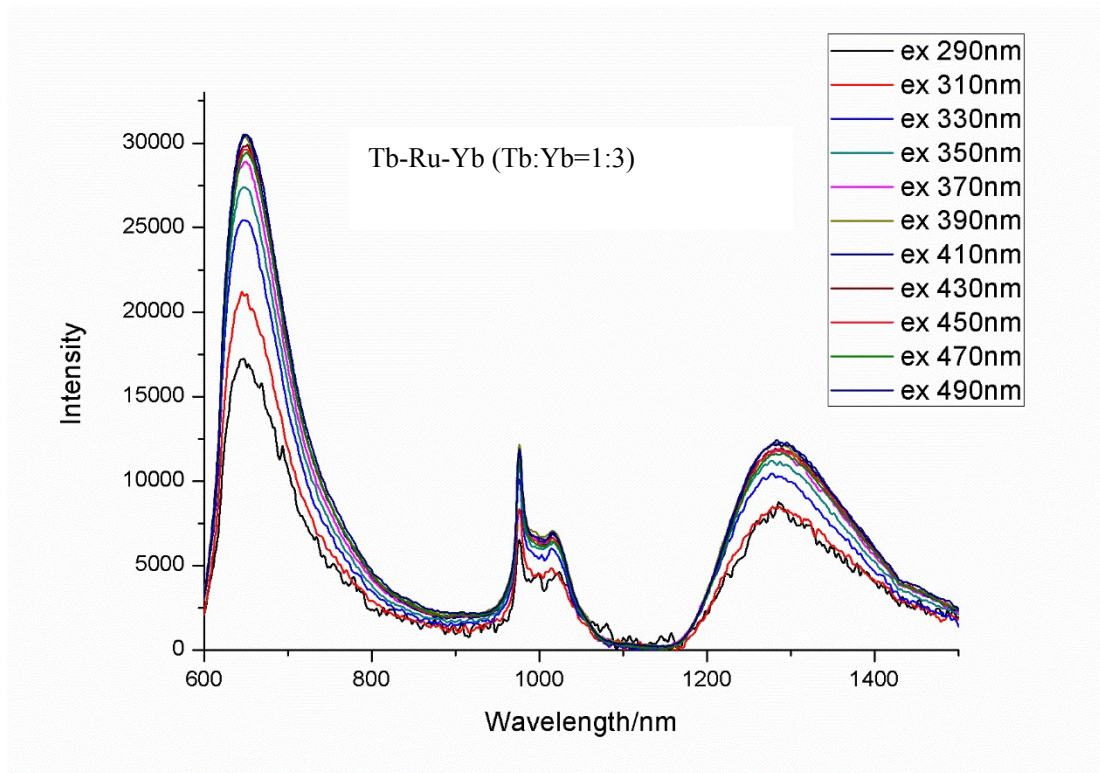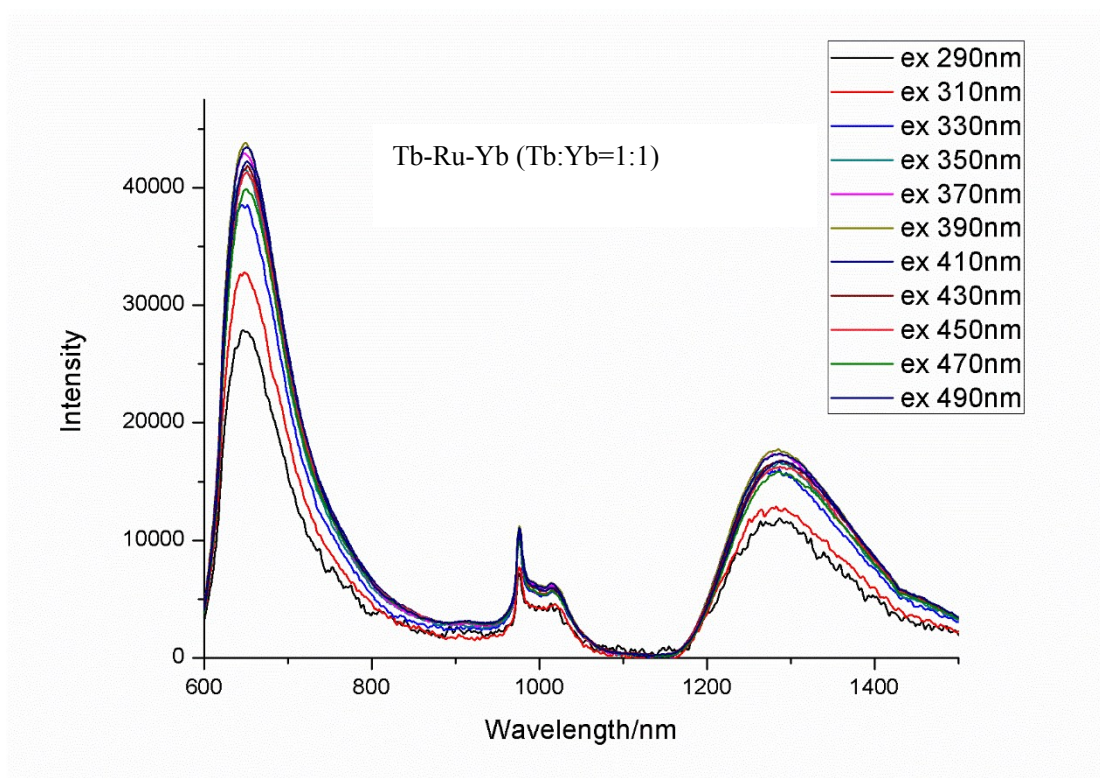

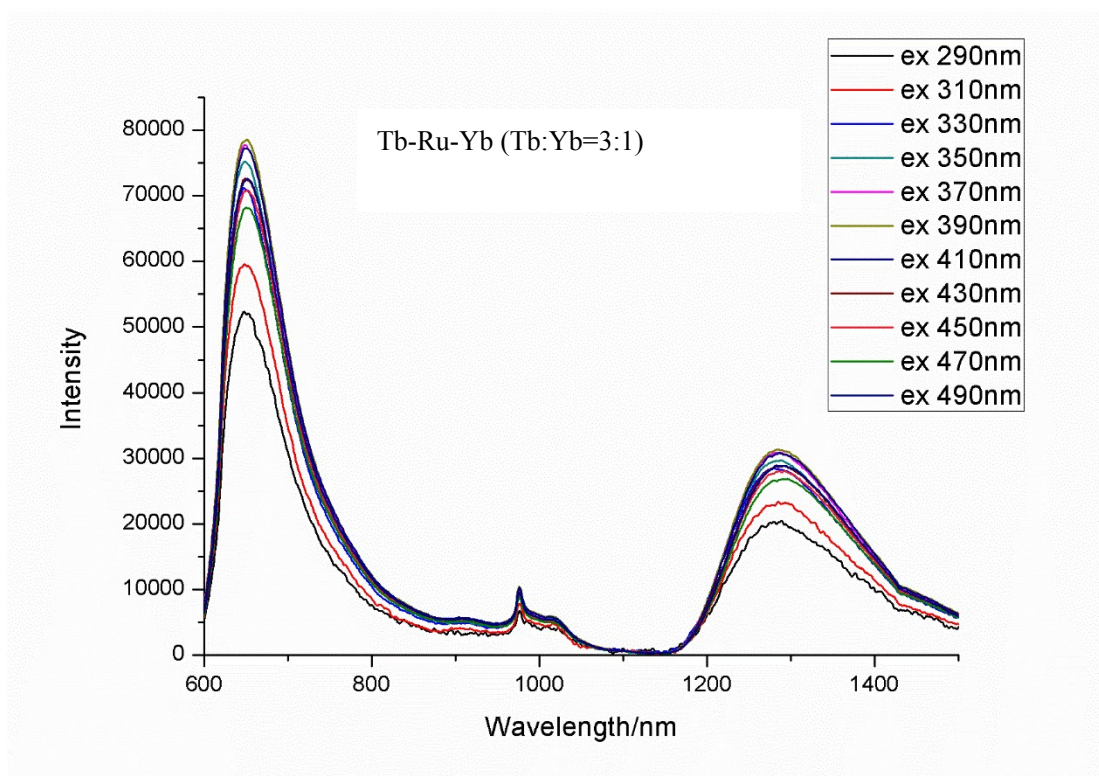

Fig. S8 Solid state excitation-wavelength-dependent emission spectra for trimetallic complexes.

Table S1. Selected bond distances (Å) and angles (°) for complex Tb-Ru.

|           |           |           |           |           |           |
|-----------|-----------|-----------|-----------|-----------|-----------|
| Ru1-N1    | 2.041(12) | Ru1-N5    | 2.043(9)  | Ru1-N2    | 2.044(11) |
| Ru1-N3    | 2.061(11) | Ru1-N6    | 2.066(9)  | Ru1-N4    | 2.068(12) |
| Ru2-N7    | 2.045(13) | Ru2-N10   | 2.049(12) | Ru2-N11   | 2.053(10) |
| Ru2-N9    | 2.053(12) | Ru2-N8    | 2.067(10) | Ru2-N12   | 2.067(10) |
| Ru3-N15   | 2.044(12) | Ru3-N14   | 2.049(11) | Ru3-N18   | 2.050(10) |
| Ru3-N17   | 2.050(9)  | Ru3-N16   | 2.068(10) | Ru3-N13   | 2.070(10) |
| Tb1-O6    | 2.365(7)  | Tb1-O3    | 2.367(7)  | Tb1-O3W   | 2.370(6)  |
| Tb1-O1W   | 2.375(6)  | Tb1-O10   | 2.384(6)  | Tb1-O2W   | 2.395(7)  |
| Tb1-O4    | 2.589(7)  | Tb1-O5    | 2.606(8)  | Tb1-O9    | 2.610(7)  |
| N1-Ru1-N5 | 97.2(4)   | N1-Ru1-N2 | 79.3(5)   | N5-Ru1-N2 | 175.4(5)  |
| N1-Ru1-N3 | 96.5(5)   | N5-Ru1-N3 | 92.6(4)   | N2-Ru1-N3 | 90.8(4)   |
| N1-Ru1-N6 | 93.4(4)   | N5-Ru1-N6 | 80.1(3)   | N2-Ru1-N6 | 97.0(4)   |
| N3-Ru1-N6 | 168.4(5)  | N1-Ru1-N4 | 173.3(4)  | N5-Ru1-N4 | 86.7(4)   |
| N2-Ru1-N4 | 97.1(5)   | N3-Ru1-N4 | 77.9(5)   | N6-Ru1-N4 | 92.6(4)   |

Symmetry code: 'x, y, z'; '-x, y, -z+1/2'; 'x+1/2, y+1/2, z'; '-x+1/2, y+1/2, -z+1/2'; '-x, -y, -z'; 'x, -y, z-1/2'; '-x+1/2, -y+1/2, -z'; 'x+1/2, -y+1/2, z-1/2'

Table S2. Solid state excitation-wavelength-dependent quantum yields (QY) of different samples.

| $\lambda_{\text{ex}}/\text{nm}$ | QY/% |       |       |       |               |
|---------------------------------|------|-------|-------|-------|---------------|
|                                 | LRu  | Eu-Ru | Tb-Ru | Gd-Ru | Tb-Ru-crystal |
| 335                             | 5.1  | 12.7  | 11.7  | 11.0  | 21.8          |
| 370                             | 5.8  | 14.7  | 13.2  | 13.0  | 22.1          |
| 410                             | 5.4  | 13.6  | 12.4  | 12.6  | 21.6          |
| 450                             | 4.8  | 12.8  | 11.9  | 11.2  | 21.1          |
| 490                             | 5.4  | 13.0  | 12.1  | 11.9  | 21.6          |

Table S3. EA results for trimetallic complexes.

| Sample               | Formula                                                                                                                                         | Calculated |      |      | Measured |      |      |
|----------------------|-------------------------------------------------------------------------------------------------------------------------------------------------|------------|------|------|----------|------|------|
|                      |                                                                                                                                                 | C/%        | H/%  | N/%  | C/%      | H/%  | N/%  |
| Eu-Ru-Nd (Eu:Nd=1:3) | $[\text{Eu}_{0.25}\text{Nd}_{0.75}(\text{L-Ru})_3(\text{H}_2\text{O})_3] \cdot (\text{PF}_6)_{2.5}(\text{NO}_3)_{0.5}(\text{H}_2\text{O})_{11}$ | 41.80      | 3.43 | 9.39 | 41.82    | 3.00 | 9.17 |
| Eu-Ru-Nd (Eu:Nd=1:1) | $[\text{Eu}_{0.5}\text{Nd}_{0.5}(\text{L-Ru})_3(\text{H}_2\text{O})_3] \cdot (\text{PF}_6)_{2.5}(\text{NO}_3)_{0.5}(\text{H}_2\text{O})_{11}$   | 41.77      | 3.43 | 9.39 | 41.83    | 3.03 | 9.20 |
| Eu-Ru-Nd (Eu:Nd=3:1) | $[\text{Eu}_{0.75}\text{Nd}_{0.25}(\text{L-Ru})_3(\text{H}_2\text{O})_3] \cdot (\text{PF}_6)_{2.5}(\text{NO}_3)_{0.5}(\text{H}_2\text{O})_8$    | 42.57      | 3.27 | 9.57 | 42.41    | 3.02 | 9.41 |
| Tb-Ru-Nd (Tb:Nd=1:3) | $[\text{Tb}_{0.25}\text{Nd}_{0.75}(\text{L-Ru})_3(\text{H}_2\text{O})_3] \cdot (\text{PF}_6)_{2.5}(\text{NO}_3)_{0.5}(\text{H}_2\text{O})_{11}$ | 41.77      | 3.43 | 9.39 | 41.61    | 3.03 | 9.14 |
| Tb-Ru-Nd (Tb:Nd=1:1) | $[\text{Tb}_{0.5}\text{Nd}_{0.5}(\text{L-Ru})_3(\text{H}_2\text{O})_3] \cdot (\text{PF}_6)_{2.5}(\text{NO}_3)_{0.5}(\text{H}_2\text{O})_8$      | 42.55      | 3.27 | 9.56 | 42.42    | 2.99 | 9.42 |
| Tb-Ru-Nd (Tb:Nd=3:1) | $[\text{Tb}_{0.75}\text{Nd}_{0.25}(\text{L-Ru})_3(\text{H}_2\text{O})_3] \cdot (\text{PF}_6)_{2.5}(\text{NO}_3)_{0.5}(\text{H}_2\text{O})_8$    | 42.49      | 3.27 | 9.55 | 42.31    | 3.00 | 9.31 |
| Eu-Ru-Yb (Eu:Yb=1:3) | $[\text{Eu}_{0.25}\text{Yb}_{0.75}(\text{L-Ru})_3(\text{H}_2\text{O})_3] \cdot (\text{PF}_6)_{2.5}(\text{NO}_3)_{0.5}(\text{H}_2\text{O})_8$    | 42.29      | 3.25 | 9.50 | 41.93    | 3.01 | 9.29 |
| Eu-Ru-Yb (Eu:Yb=1:1) | $[\text{Eu}_{0.5}\text{Yb}_{0.5}(\text{L-Ru})_3(\text{H}_2\text{O})_3] \cdot (\text{PF}_6)_{2.5}(\text{NO}_3)_{0.5}(\text{H}_2\text{O})_8$      | 42.38      | 3.26 | 9.52 | 42.18    | 2.94 | 9.33 |
| Eu-Ru-Yb (Eu:Yb=3:1) | $[\text{Eu}_{0.75}\text{Yb}_{0.25}(\text{L-Ru})_3(\text{H}_2\text{O})_3] \cdot (\text{PF}_6)_{2.5}(\text{NO}_3)_{0.5}(\text{H}_2\text{O})_8$    | 42.46      | 3.27 | 9.54 | 42.25    | 2.97 | 9.37 |
| Tb-Ru-Yb (Tb:Yb=1:3) | $[\text{Tb}_{0.25}\text{Yb}_{0.75}(\text{L-Ru})_3(\text{H}_2\text{O})_3] \cdot (\text{PF}_6)_{2.5}(\text{NO}_3)_{0.5}(\text{H}_2\text{O})_8$    | 42.27      | 3.25 | 9.50 | 41.92    | 2.98 | 9.27 |
| Tb-Ru-Yb (Tb:Yb=1:1) | $[\text{Tb}_{0.5}\text{Yb}_{0.5}(\text{L-Ru})_3(\text{H}_2\text{O})_3] \cdot (\text{PF}_6)_{2.5}(\text{NO}_3)_{0.5}(\text{H}_2\text{O})_{10}$   | 41.77      | 3.36 | 9.39 | 41.40    | 2.99 | 9.22 |
| Tb-Ru-Yb (Tb:Yb=3:1) | $[\text{Tb}_{0.75}\text{Yb}_{0.25}(\text{L-Ru})_3(\text{H}_2\text{O})_3] \cdot (\text{PF}_6)_{2.5}(\text{NO}_3)_{0.5}(\text{H}_2\text{O})_9$    | 42.10      | 3.31 | 9.46 | 42.01    | 3.04 | 9.25 |
